# Supplementary material
Source: Research Square preprint supplement (doi:10.21203/rs.3.rs-8826194/v1)
Supplement: Supplementary file 1 [file 1af575235e7f109e463c0f8d.docx]

# Supplementary materials


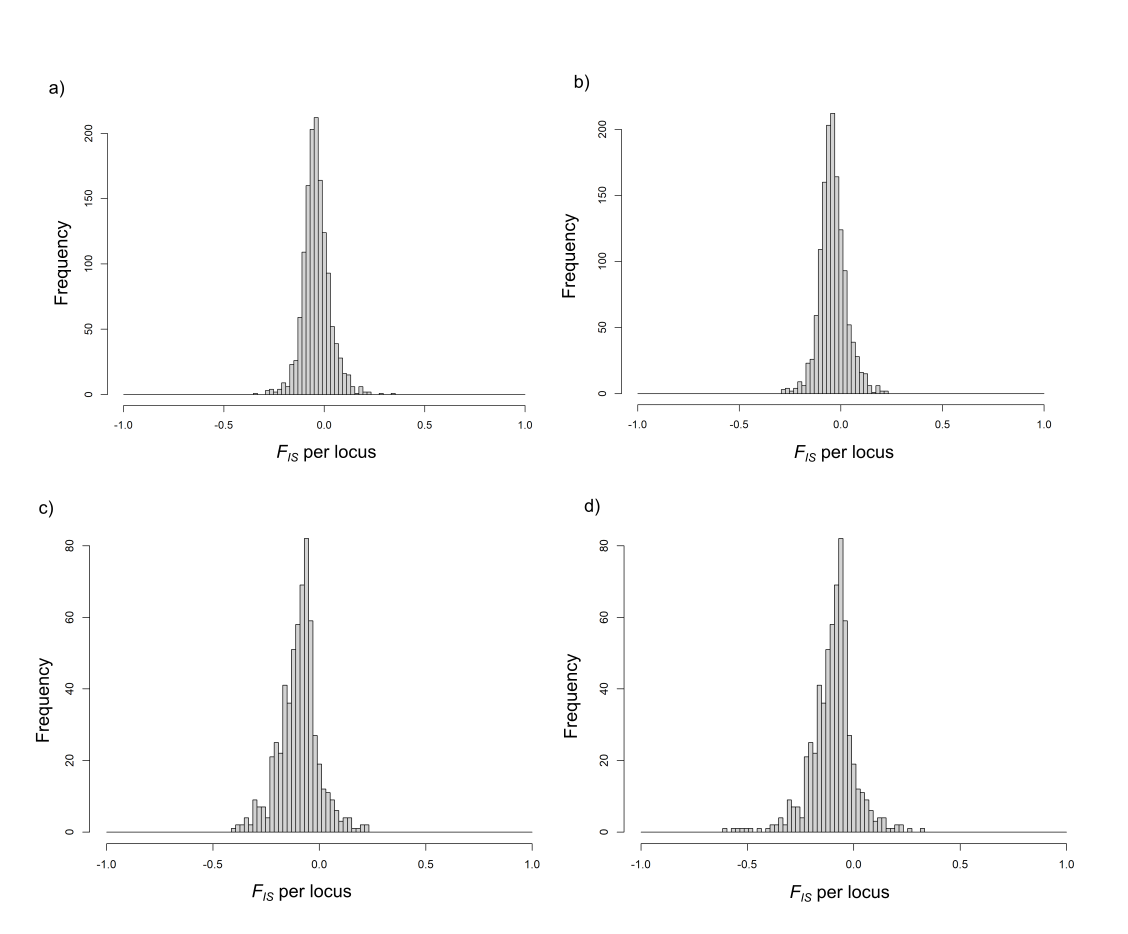


Fig. S1. Distribution of *F*IS per locus before (left) and after (right) *F*IS filtering.

a) and b) full dataset, c) and d) Haida Gwaii dataset


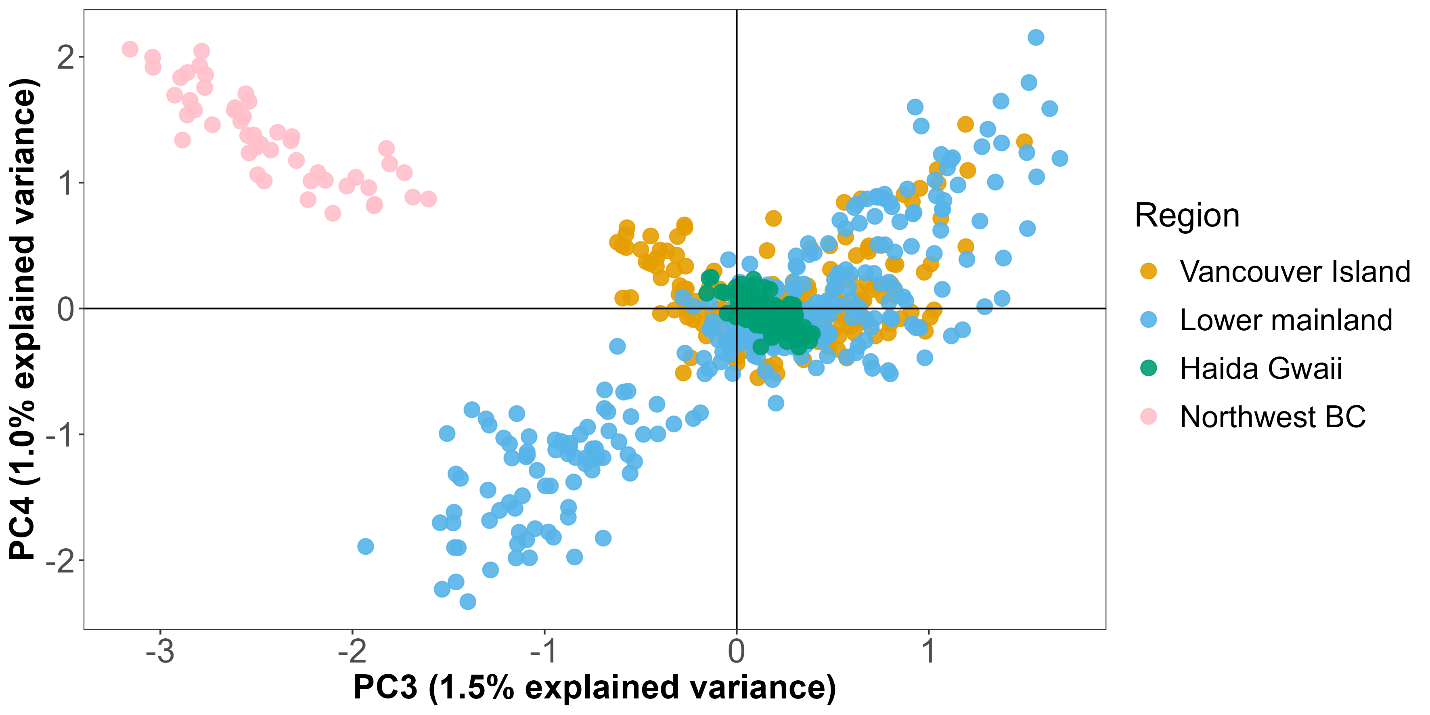


Fig. S2. Full dataset PCA with PC3 and PC4 axes.


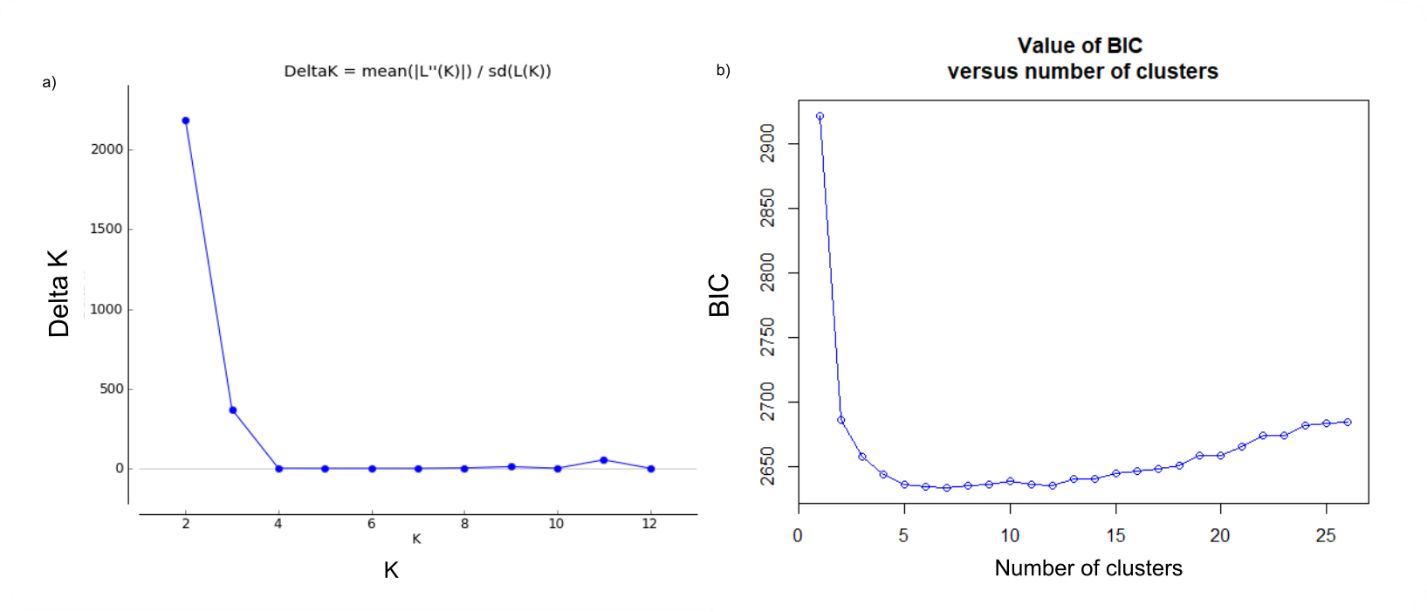


Fig. S3. Full dataset a) Delta K from *STRUCTURE*, b) BIC plot from DAPC.


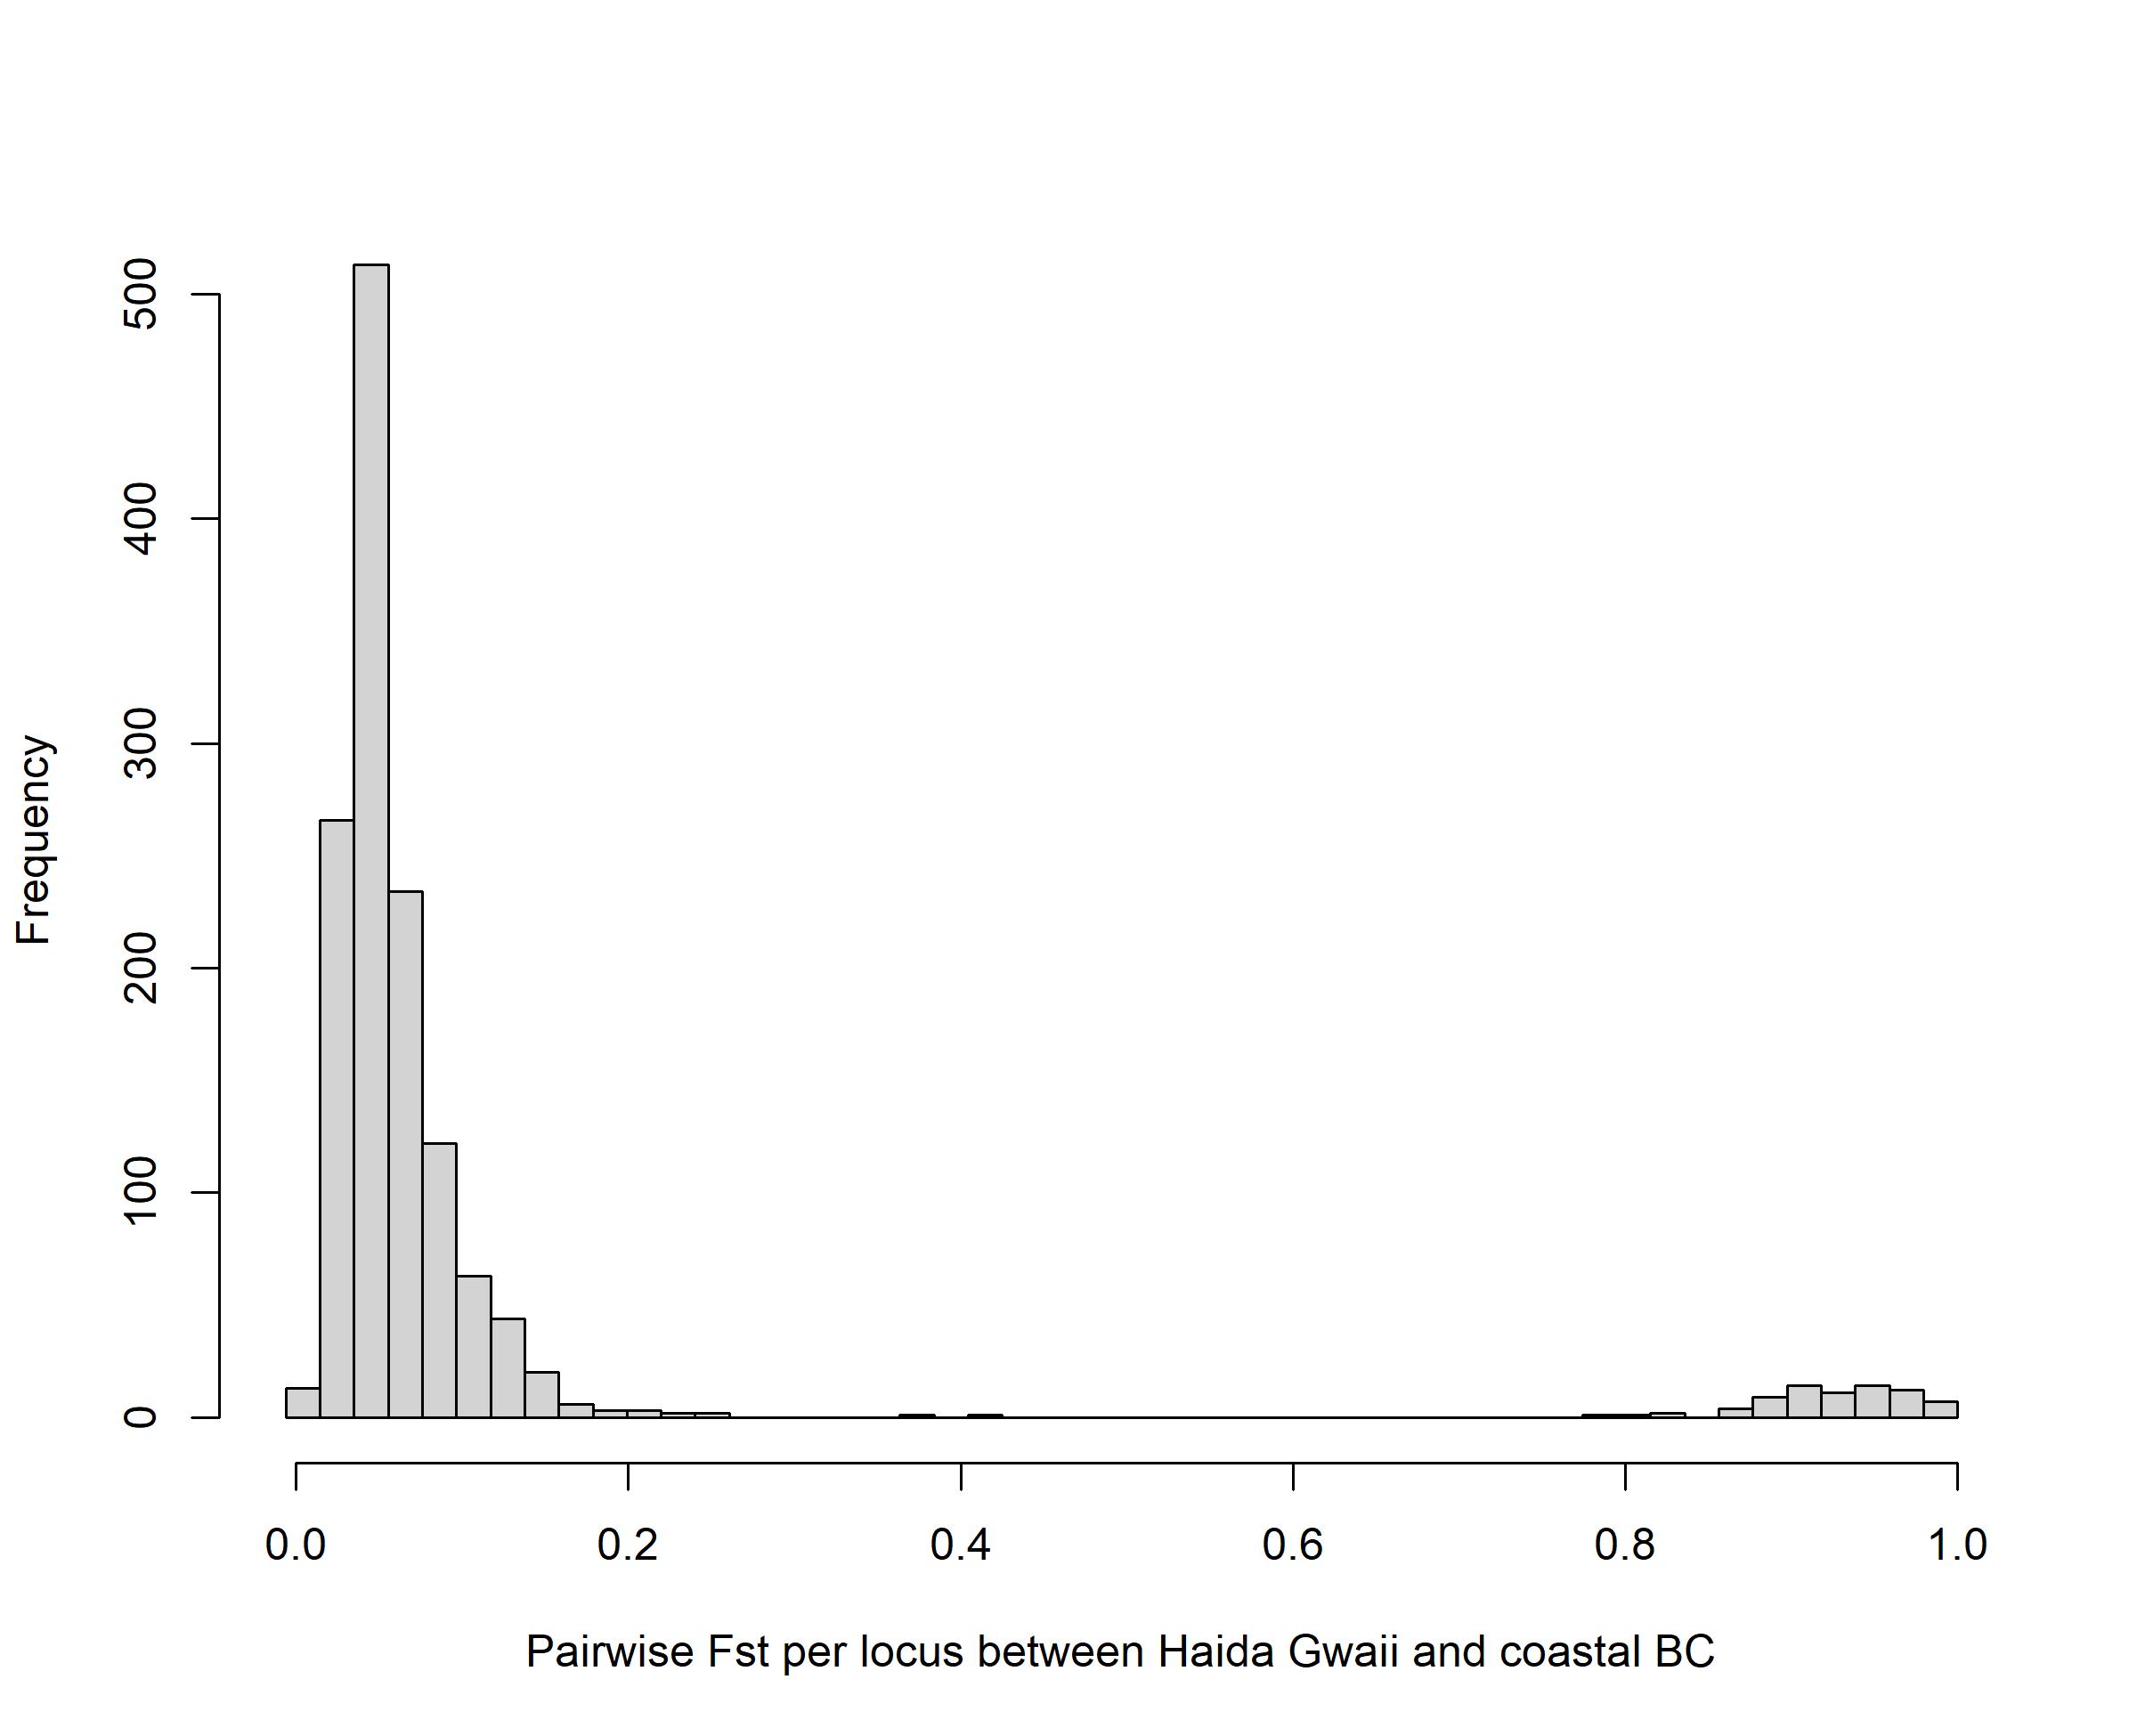


Fig. S4. Distribution of (non-weighted) pairwise *FST* per locus for Haida Gwaii versus elsewhere in coastal BC.


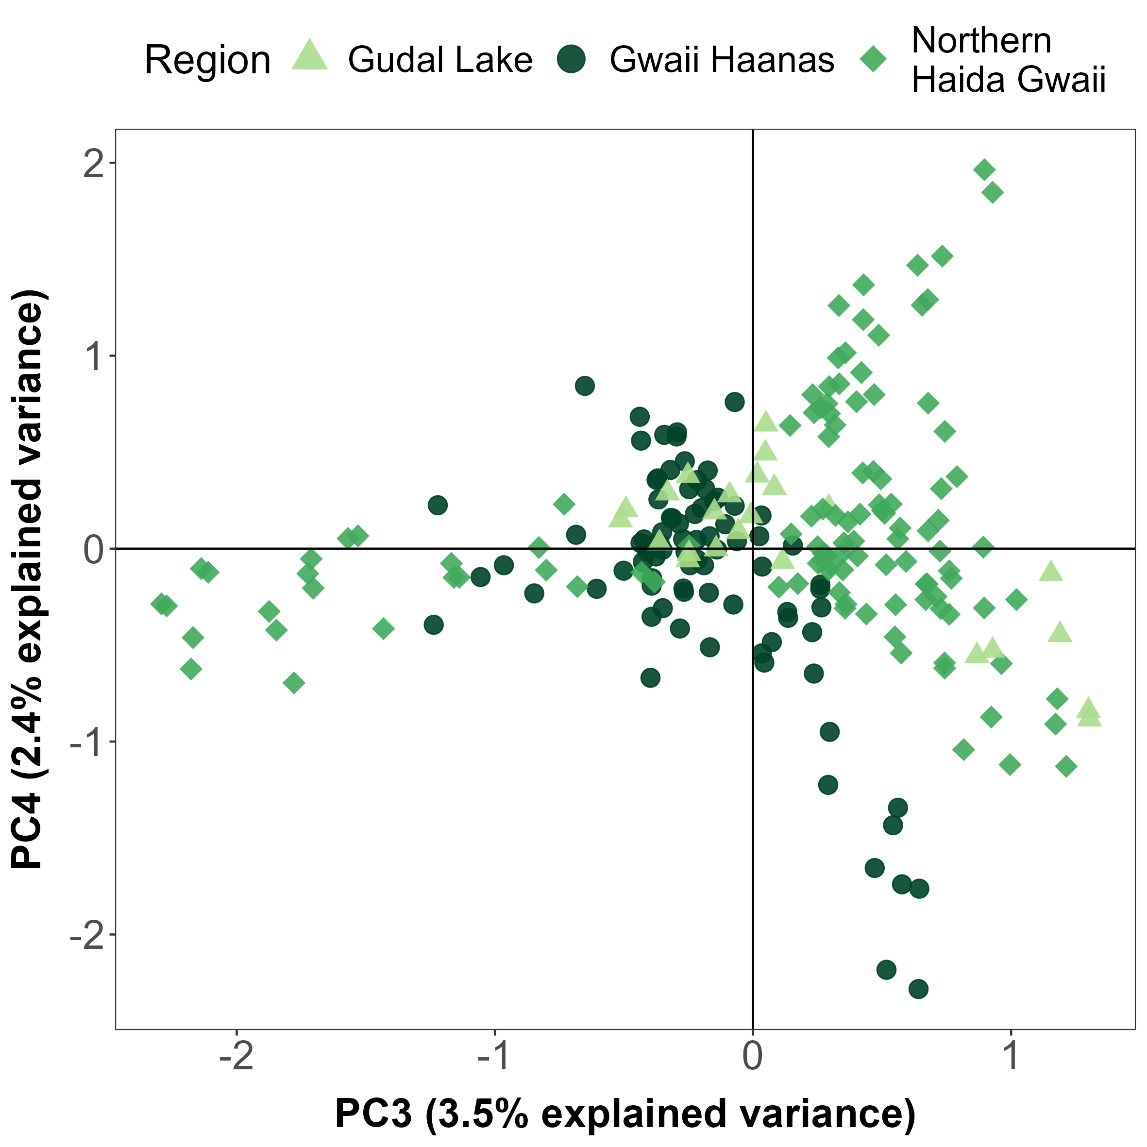


Fig. S5. PCA of Haida Gwaii SNPs with PC3 and PC4 axes.


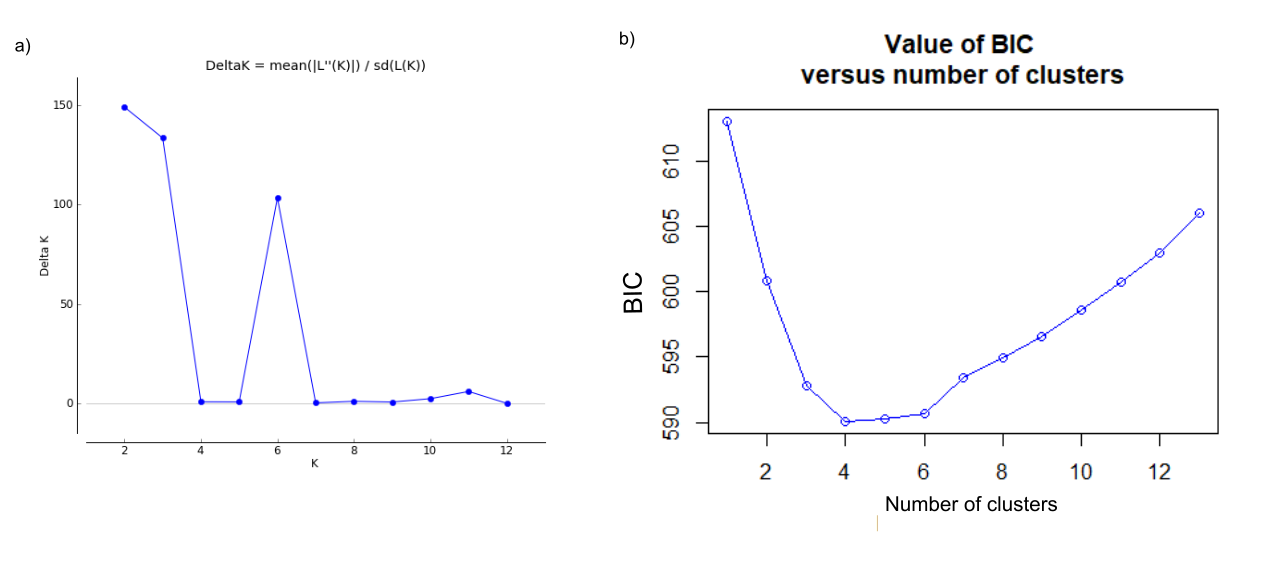


Fig. S6. Haida Gwaii a) Delta K from *STRUCTURE*, b) BIC plot from DAPC.


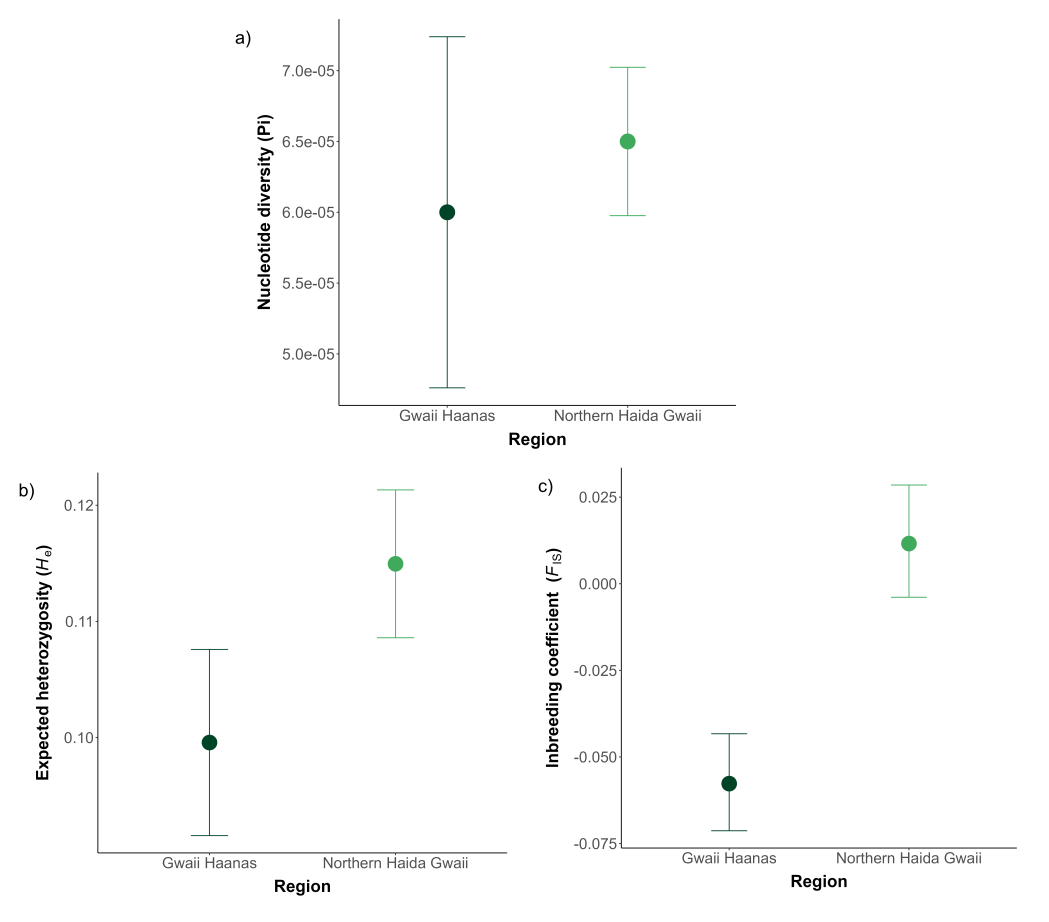


Fig. S7. Genetic diversity of Haida Gwaii toad populations – for Gwaii Haanas versus northern Haida Gwaii.

a) Nucleotide diversity (π), b) expected heterozygosity (*H*e), and c) inbreeding coefficient (*F*IS) – all with mean and 95% confidence intervals.

Table S1. Table of pairwise *F*ST estimates per breeding site for the full dataset.

Breeding site codes (first three characters of every name) are as follows: Haida Gwaii and Northwest BC = R06, Vancouver Island = R01, lower mainland = R02.

**Table S2. Evanno table from Structure Harvester for the full dataset.**


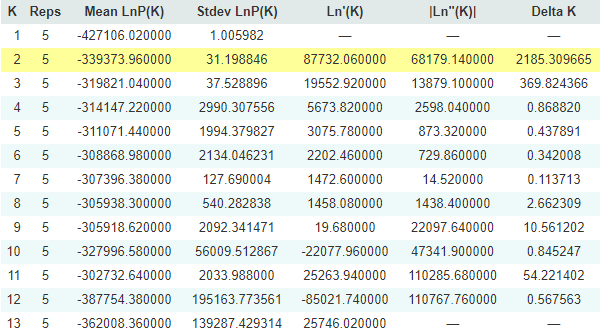


**Table S3. Evanno table from Structure Harvester for the Haida Gwaii dataset.**


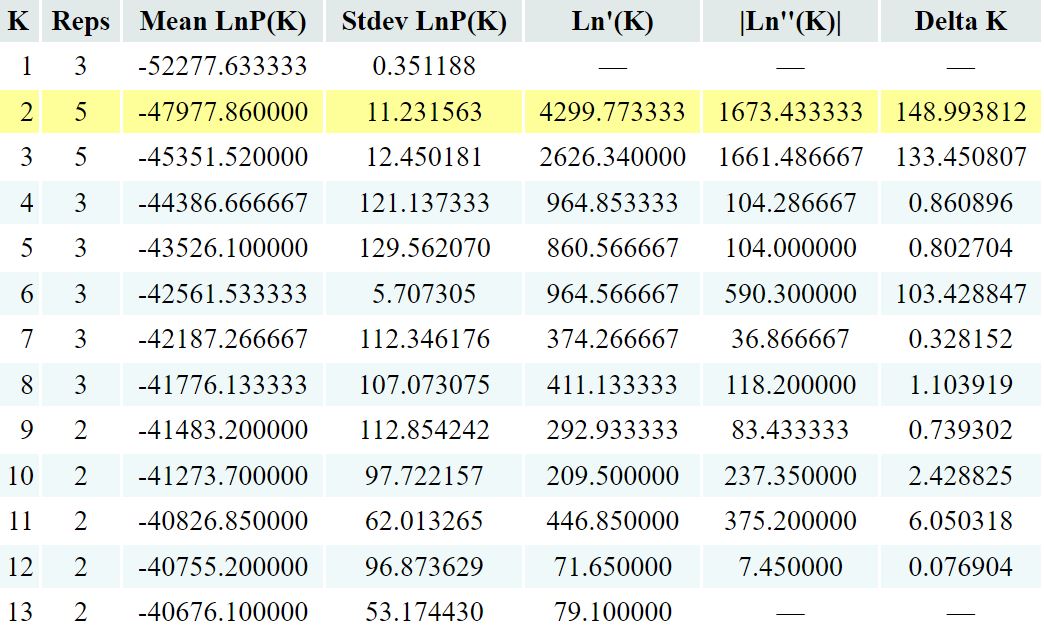


Table S4. Table of *F*IS estimates and confidence intervals for the four regions. Fis_ll = lower confidence interval, Fis_hl = higher confidence interval.

Table S5. Table of pairwise *F*ST values per breeding site for Haida Gwaii analysis.
